# Supplementary material
Source: PubMed Central journal article supplement (PMC1986835)
Supplement: NIHMS28902-supplement-01.pdf [file NIHMS28902-supplement-01.pdf]

PLA<sub>2</sub> and PI3K/PTEN Pathways Act

in Parallel to Mediate Chemotaxis

Lingfeng Chen, Miho Iijima, Ming Tang, Mark A. Landree, Yi Elaine Huang, Yuan Xiong, Pablo A. Iglesias, and Peter N. Devreotes

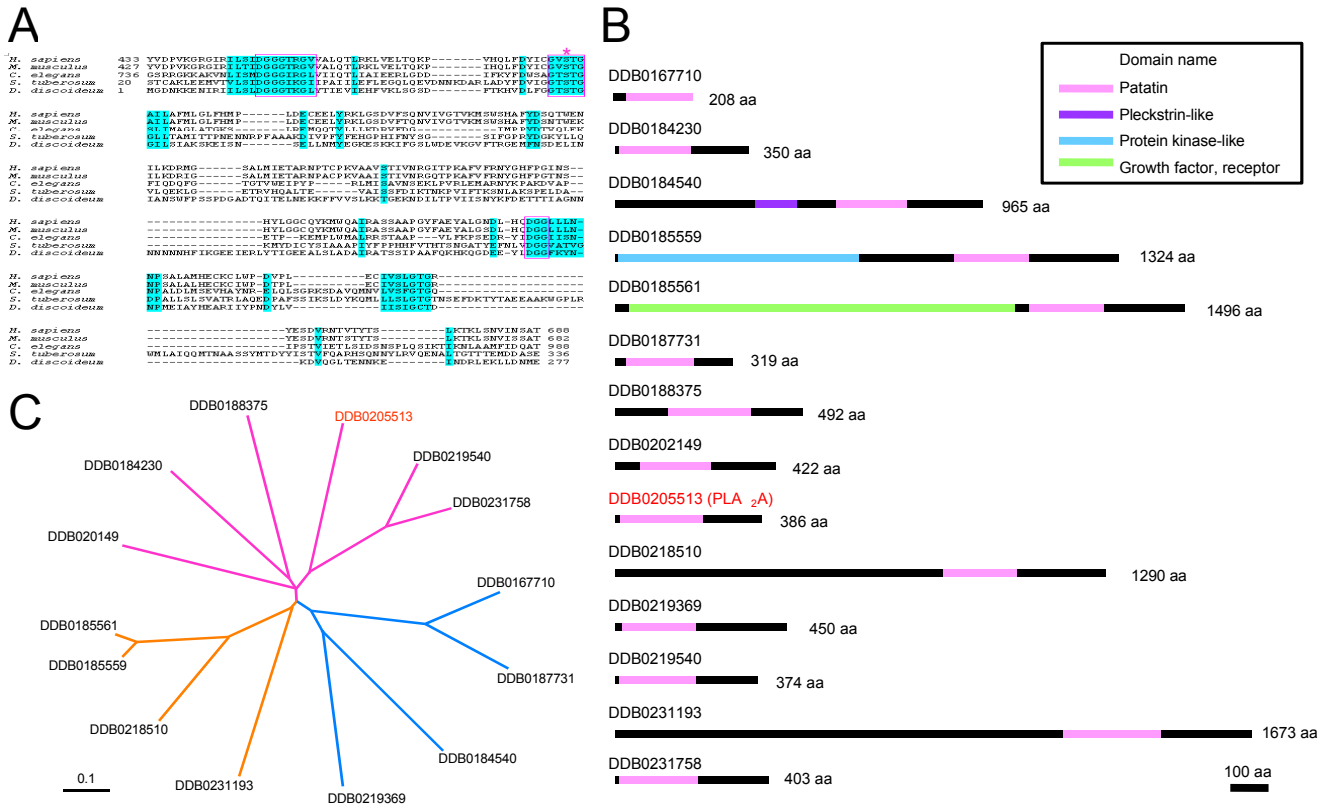

Figure S1. Sequence Analysis of the PLA<sub>2</sub> Family in *D. discoideum*

(A) Alignment of patatin and iPLA<sub>2</sub>. The patatin domain is evolutionarily conserved from plants to animals. Consensus sequences are highlighted in blue. Residues that are important for catalytic activity for PLA<sub>2</sub> are boxed in red. Star indicated the catalytic Serine. (B) Domain structures of PLA<sub>2</sub>s in *D. discoideum* are shown. Fourteen novel PLA<sub>2</sub>s are identified in the genome database (the DictyBase, <http://www.dictybase.org>). Predicted domains are indicated by different colors: pink, patatin domain; purple, pleckstrin-like domain; blue, protein kinase-like domain; green, growth factor receptor domain. (C) Phylogenetic analysis of PLA<sub>2</sub> homologs in *D. discoideum*. Sequences are analyzed using Clustal W from EMBL-EBI.

A

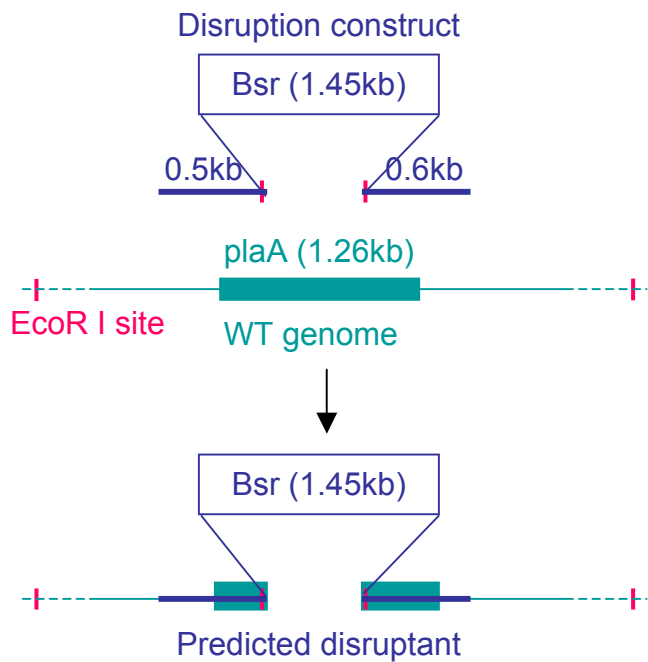

B

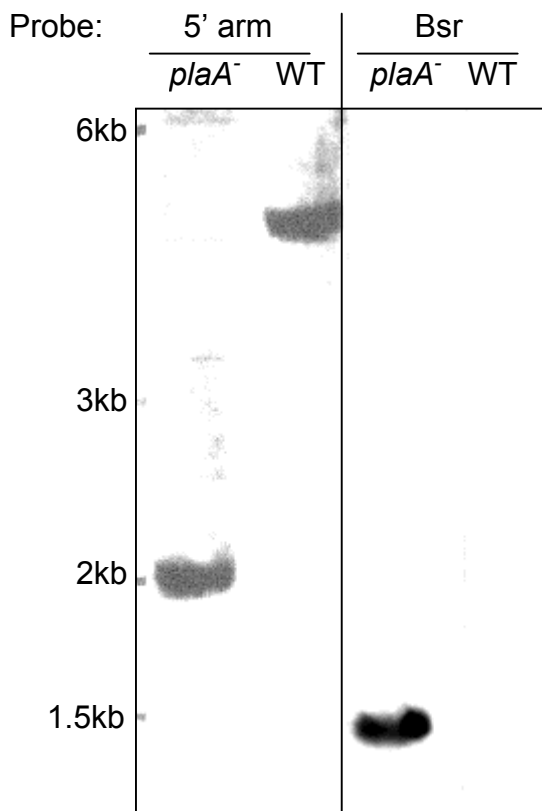

## Figure S2. Disruption of PLA<sub>2</sub>A

Transformants were picked at random and gene disruptants were identified by southern hybridization of several digests with different probes. (A) Strategy for disruption. A blasticidin resistant marker (Bsr) was inserted into middle of the gene, replacing part of the open reading frame. (B) Southern blotting to confirmation of disruption. Genomic DNA was prepared from wild type and *pla<sub>2a</sub><sup>-</sup>* cells and subjected to EcoR I digestion. DNA samples were transferred onto membranes and hybridized with two different probes. With the 5' region as a probe, the *pla<sub>2a</sub><sup>-</sup>* cells showed a 2.1 kb band while wild type cells showed a 4.9 kb band. With Bsr as a probe, the *pla<sub>2a</sub><sup>-</sup>* cells showed a 1.5 kb band while wild type cells showed no band.
